# Supplementary material for: Clinical Spectrum of Talaromyces marneffei Infections in HIV-Negative Patients: An 18-Case Series Including a Rare Presentation with Gastrointestinal Onset, Adrenal Mass, and Hemophagocytic Lymphohistiocytosis
Source: Research Square preprint supplement (doi:10.21203/rs.3.rs-7534416/v1), 2025-09-17
Supplement: Supplementary file 1 [file 073a148d129c73926842b094.xlsx]

## Sheet: Table 1
Table 1 Characteristics of the 18 patients with TM infection
ID	Gender	Age	Misdiagnosis	Clinical manifestations	Diagnostic methods	Imaging examination (Fig 1)	Weeks before diagnosis	Comorbidities	Co-infection	Therapy	Outcome
		(years)
P1	Male	57	Gouty arthritis	Fever, cough, arthralgia	BALF culture	Reticular nodular , ground-glass opacities	20	Post-kidney transplantation，diabetes	EBV, CMV	Amphotericin B, posaconazole	Remission
P2	Male	74	CAP	Fever, cough, fatigue	BALF mNGS	Patchy and nodular shadows ground-glass opacities	1	Colorectal cancer	MTB	Posaconazole, rifampin, isoniazid, moxifloxacin	Death
P3	Male	58	Tumor	Cough, expectoration, cachexia, ablepsia	Pulmonary nodule Pathology	Nodules, Patchy shadows	8	Post-kidney transplantation, uremia	CMV, VZV	Voriconazole, acyclovir, imipenem, teicoplanin	Death
P4	Female	48	TB	Fever, cough, cutaneous lesions, anemia	Pleural effusion mNGS	Patchy shadow	4	Post-kidney transplantation	Candida albicans	Posaconazole	Remission
P5	Male	51	Urinary tract bacterial infection	Frequent urination, urgent urination, anemia	Urine culture	None	8	Post-kidney transplantation, hypertension	None	Amphotericin B	Remission
P6	Male	59	Osteoblastic metastasis	Cough, expectoration, arthralgia, lymphadenopathy, anemia	Sputum culture	Mass shadow, patchy shadow, hydropneumothorax, lymph node enlargement	12	Lung cancer	None	Amphotericin B	Death
P7	Male	75	Rheumatoid Arthritis, TB	Cough, cutaneous lesions, arthralgia	BALF mNGS	Multiple cystic density reduction shadows, mass shadows, lymph node enlargement	18	TB	MTB	Amphotericin B, levofloxacin, pyrazinamide	Remission
P8	Male	58	CAP	Cough, expectoration, fatigue, diarrhea	BALF mNGS	Patchy shadow	10	Renal insufficiency, , AIAD	Aspergillus	Amphotericin B	Recurrence
P9	Male	55	None	Cough, hemoptysis	Pleural effusion mNGS	Nodule shadows , vacuoles and patchy shadows.	2	Diabetes, pneumothorax	None	Voriconazole	Remission
P10	Female	62	TB	Cough, hemoptysis, anemia	BALF mNGS	Bronchiectasis, multiple patchy nodular shadows	21	Bronchiectasis	None	Amphotericin B	Remission
P11	Male	62	CAP	Fever, nausea and vomitting, fatigue, anemia	BALF mNGS	Nodule shadow, pneumonia, bronchiectasis	2	Bronchiectasis, Post-Nephrectomy Nephrolithiasis	Aspergillus, pneumonia streptococcus	Voriconazole,levofloxacin	Death
P12	Male	62	Influenza virus infection	Cough, hemoptysis, arthralgia	BALF mNGS	Nodule shadow, bronchiectasis, emphysema	2	TB, Bronchiectasis, diabetes	NTM	Amphotericin B, rifampin, moxifloxacin, clarithromycin, isoniazid	Remission
P13	Male	62	CAP	Fever,shortness of breath	BALF mNGS	Patchy shadows	12	Hypertension	None	Amphotericin B	Remission
P14	Female	38	TB	Fever, expectoration, lymphadenopathy, cutaneous lesions,arthritis, anemia	BALF mNGS	Pneumonia with pleural effusion, lymph node enlargement， osteolytic bone lesions	12	Postoperative thyroid cancer resection, AIAD	Staph aureus	Amphotericin B, vancomycin	Recurrence
P15	Male	66	TB	Fever, expectoration, lymphadenopathy	BALF mNGS	Pneumonia with pleural effusion， lymph node enlargement	20	TB	Aspergillus,MTB	Voriconazole, rifampin, isoniazid, moxifloxacin	Remission
P16	Female	32	Acute gastroenteritis, peptic ulcer	Fever, abdominal pain and bloating, anemia, HLH	Blood mNGS	Adrenal mass	4	SLE	EBV	Amphotericin B	Remission
P17	Male	53	Influenza virus infection	Fever, arthritis, anemia	Blood mNGS	Nodular density shadow, pulmonary bronchial inflation sign	4	Post-kidney transplantation Hepatitis C	Hepatitis C virus, NTM, aspergillus	Amphotericin B, linezolid	Remission
P18	Male	71	TB	Fever, expectoration, lymphadenopathy, anemia	BALF mNGS	Pneumonia, chronic tuberculosis; nodules，lymph node enlargement	1.5	Membranous nephropathy,TB, diabetes	None	Amphotericin B	Remission
AIAD anti-interferon-γautoantibodies; BALF Bronchoalveolar lavage fluid; CAP Community-Acquired Pneumonia; CBV Cytomegalo virus; EBV Epstein-Barr virus; HLH Hemophagocytic Lymphohistiocytosis; MTB Mycobacterium tuberculosis; NTM Nontuberculous mycobacteria; SLE Systemic lupus erythematosus; NTM Nontuberculous mycobacteria; VZV Varicella-zoster virus

## Sheet: Table 2
Table 2 Laboratory work-up results of the 18 patients with TM infection
ID	WBC (×109)	HB (g/L)	PLT(×109)	ALT (U/L)	Cr (μmol/L)	CRP(mg/L)	PCT(ng/L)	G-test (pg/mL)	GM-test (S/CO)	CD3 (cells/ul)	CD4 (cells/ul)	CD8 (cells/ul)	CD4/CD8
P1	3.69	103	150	14.3	198	13.9	<0.05	80.375	≤0.5	468	209	252	0.83
P2	3.51	115	111	8.3	93	96.9	0.2	<37.5	≤0.5	281	154	107	1.44
P3	6.72	51	171	6	327	14.7	5.74	<37.5	4.624	378	278	93	2.97
P4	3.92	80	215	287	143	20.9	<0.05	<37.5	≤0.5	1038	726	219	3.32
P5	4.41	91	312	10	241	36.9	<0.05	<37.5	≤0.5	665	202	406	0.5
P6	6.14	122	314	5.4	61	<6.0	<0.05	132.3	≤0.5	1354	905	410	2.2
P7	6.37	117	237	10	74	<6.0	<0.05	62.137	1.099	1028	728	240	3.03
P8	14.02	120	356	21.8	507	52.5	0.24	74.481	2.565	1664	1348	208	6.48
P9	4.95	150	164	29.6	51	<6.0	<0.05	44.996	≤0.5	648	368	232	1.59
P10	7.26	117	276	27	62	25.5	<0.05	<37.5	≤0.5	1364	716	572	1.25
P11	6.55	162	185	41	87	<6.0	<0.05	NM	5.21	1330	709	532	1.34
P12	3.93	118	176	6.3	60.3	<6.0	<0.05	NM	≤0.5	800	380	368	1.03
P13	9.63	107	280	120.7	80.2	109	0.13	<37.5	4.101	772	688	132	21.5
P14	13.14	61	178	35.2	34.1	190.1	4.06	>600.000	4.786	NM	NM	NM	NM
P15	26.04	104	391	5.3	77.9	90.7	0.44	378.9	3.465	1572	740	744	0.99
P16	10.23	97	57	68	44	97.03	2.07	>600.000	4.336	NM	NM	NM	NM
P17	3.27	60	62	38	601.9	22.9	2.07	<37.5	2.591	141	60	64	0.94
P18	5.29	132	73	80	82	107.6	2.82	417.506	5.332	NM	NM	NM	NM
Normal ranges: white cell count: 3.5–9.5×109/L; hemoglobin: 130-175 g/L; platelet 125-350×109/L; hematocrit: 125-350×109/L; alanine transaminase 7-50 U/L; creatinine 53-115 μmol/L; C-reactive protein 0-6 mg/L; procalcitonin ＜0.05 ng/L; (1,3)-β-D-Glucan test <37.5 pg/mL; CD3 cell counts 770-2860 cells/ul; CD4 cell counts 500-1440 cells/ul; CD8 cell counts 238-1525 cells/ul; CD4/CD8 1.05-2.03; gala…

## Sheet: Table 3
Table 3 Laboratory work-up results for P16
TIME	WBC	RBC	HB	HCT	PLT	DD	PT	APTT	TT	FB
	(×109/L)	(×1012/L)	(g/L)	(%)	(×109/L)	(mg/L)	(sec)	(sec)	(sec)	(g/L)
2025-03-29	10.23	4.57	137	39.2	57	>35.2	13.9	22.8	18.4	1.75
2025-03-31	16.49	3.58	105	30.6	43	>35.2	16.4	30.5	19.7	1.47
2025-04-01	14.86	3.01	89	25.5	21	20	15.5	36.7	18.2	1.94
2025-04-02	11.64	2.54	74	21.8	8	12	16.7	41.1	18.4	1.75
2025-04-03	10.96	1.98	59	17	9	7.85	15	37.9	20.1	2.29
2025-04-04	13.23	2.73	79	23.6	10	13.13	12.9	28.5	18.1	1.7
2025-04-05	12.44	2.82	82	24.6	16	20.33	13.5	34.5	18.2	2.12
2025-04-06	11.52	2.57	75	22.9	22	19.16	12.6	29.3	17.3	2.06
2025-04-07	8.3	2.06	62	18.7	7	>35.2	13.8	30.2	17.7	2.26
2025-04-08	7.5	2.05	61	18.8	8	>35.2	12.9	25.8	16.9	2.81
2025-04-09	5.85	2	61	18.3	12	24.9	12.3	25.7	16.7	2.97
2025-04-10	5.19	1.88	58	17.4	18	N	N	N	N	N
2025-04-11	6.13	2.49	76	23.1	40	7.31	11.9	23.9	17.5	2.97
2025-04-12	5.94	2.38	75	22.3	40	N	N	N	N	N
2025-04-14	4.41	2.58	82	24.6	55	3.06	12.8	24.6	17.6	2.92
2025-04-16	3.29	2.71	86	26	71	1.64	12.6	23.7	17.2	3.22
2025-06-01	3.77	4.24	132	39.3	147	N	11.2	26.1	14	2.64
Normal ranges: white cell count: 3.5-9.5×109/L; red blood cell count: 4.3-5.8×1012/L; hemoglobin: 130-175 g/L; hematocrit: 125-350×109/L; Platelet 125-350×109/L; D-Dimer < 0.5mg/L; prothrombin time: 9.8–12.1 sec; activated partial thromboplastin time: 25–31.3 sec; thrombin time: 14–21 sec; fibrinogen: 2-4 g/L; WBC White cell count; RBC Red blood cell coun; HB Hemoglobin; HCT Hematocrit; PLT Plate…
